# Supplementary material
Source: PubMed Central journal article supplement (PMC3511793)
Supplement: NIHMS419270-supplement-1_si_001.pdf [file NIHMS419270-supplement-1_si_001.pdf]

## Supporting Information

### Experimental quantification of electrostatics in X-H $\cdots\pi$ hydrogen bonds

Miguel Saggu,<sup>1\*</sup> Nicholas M. Levinson,<sup>1\*</sup> and Steven G. Boxer<sup>1\*</sup>

<sup>1</sup> Department of Chemistry, Stanford University, Stanford, CA 94305-5012, USA

\* To whom correspondence should be addressed. E-mail: [miguel.saggu@gmail.com](mailto:miguel.saggu@gmail.com) (M.S.),  
[nickl@stanford.edu](mailto:nickl@stanford.edu) (N.M.L.), [sboxer@stanford.edu](mailto:sboxer@stanford.edu) (S.G.B.)

## Tables

**Table S1.** Observed vibrational frequencies for the N-H stretch mode of indole and S-H stretch mode of thiophenol dissolved in different organic solvents at room temperature. The 3<sup>rd</sup> column shows the frequency shifts relative to the peak of the free species in carbon tetrachloride.

| solvent                             | N-H frequency (cm <sup>-1</sup> ) | rel. shift (cm <sup>-1</sup> ) |
|-------------------------------------|-----------------------------------|--------------------------------|
| carbon tetrachloride                | 3491.5                            | 0                              |
| <i>m</i> -dichlorobenzene           | 3473.8                            | -17.7                          |
| <i>o</i> -dichlorobenzene           | 3469.6                            | -21.9                          |
| chlorobenzene                       | 3465.4                            | -26.1                          |
| <i>m</i> -fluorotoluene             | 3451.7                            | -39.8                          |
| benzene                             | 3444.9                            | -46.6                          |
| toluene                             | 3438.7                            | -52.8                          |
| <i>p</i> -xylene                    | 3432.5                            | -59.0                          |
| mesitylene                          | 3425.0                            | -66.5                          |
| 1,2,4-trimethylbenzene              | 3425.4                            | -66.1                          |
| tetramethylbenzene/CCl <sub>4</sub> | 3420.9                            | -70.6                          |
| pentamethylbenzene/CCl <sub>4</sub> | 3412.3                            | -79.3                          |
| hexamethylbenzene/CCl <sub>4</sub>  | 3402.6                            | -87.9                          |

| solvent                             | S-H frequency (cm <sup>-1</sup> ) | rel. shift (cm <sup>-1</sup> ) |
|-------------------------------------|-----------------------------------|--------------------------------|
| carbon tetrachloride                | 2589.0                            | 0                              |
| <i>m</i> -dichlorobenzene           | 2581.0                            | -8.0                           |
| <i>o</i> -dichlorobenzene           | 2580.6                            | -8.4                           |
| chlorobenzene                       | 2578.7                            | -10.3                          |
| <i>m</i> -fluorotoluene             | 2574.0                            | -15.0                          |
| benzene                             | 2572.1                            | -16.9                          |
| toluene                             | 2569.9                            | -19.1                          |
| <i>p</i> -xylene                    | 2567.1                            | -21.9                          |
| mesitylene                          | 2562.7                            | -26.3                          |
| 1,2,4-trimethylbenzene              | 2563.0                            | -26.0                          |
| tetramethylbenzene/CCl <sub>4</sub> | 2559.6                            | -29.4                          |
| pentamethylbenzene/CCl <sub>4</sub> | 2554.6                            | -34.4                          |
| hexamethylbenzene/CCl <sub>4</sub>  | 2548.8                            | -40.2                          |

**Table S2.** Observed vibrational frequencies for the O-H stretch mode of phenol dissolved in different organic solvents at room temperature. The 3<sup>rd</sup> column shows the frequency shifts relative to the peak of the free species in carbon tetrachloride.

| solvent                             | O-H frequency (cm <sup>-1</sup> ) | rel. shift (cm <sup>-1</sup> ) |
|-------------------------------------|-----------------------------------|--------------------------------|
| carbon tetrachloride                | 3611.0                            | 0                              |
| <i>m</i> -dichlorobenzene           | 3586.1                            | -24.9                          |
| <i>o</i> -dichlorobenzene           | 3583.4                            | -27.6                          |
| chlorobenzene                       | 3575.8                            | -35.2                          |
| <i>m</i> -fluorotoluene             | 3568.0                            | -43.0                          |
| benzene                             | 3555.9                            | -55.1                          |
| toluene                             | 3549.6                            | -61.4                          |
| <i>p</i> -xylene                    | 3542.9                            | -68.1                          |
| mesitylene                          | 3534.4                            | -76.7                          |
| 1,2,4-trimethylbenzene              | 3535.0                            | -76.0                          |
| tetramethylbenzene/CCl <sub>4</sub> | 3526.6                            | -84.4                          |
| pentamethylbenzene/CCl <sub>4</sub> | 3515.5                            | -95.1                          |
| hexamethylbenzene/CCl <sub>4</sub>  | 3505.2                            | -105.8                         |

**Table S3.** Observed vibrational frequencies for the N-H and N-D stretch modes of pyrrol dissolved in different organic solvents at room temperature. The 3<sup>rd</sup> column shows the frequency shifts relative to the peak of the free species in carbon tetrachloride.

| solvent                             | N-H frequency (cm <sup>-1</sup> ) | rel. shift (cm <sup>-1</sup> ) | N-D frequency (cm <sup>-1</sup> ) | rel. shift (cm <sup>-1</sup> ) |
|-------------------------------------|-----------------------------------|--------------------------------|-----------------------------------|--------------------------------|
| carbon tetrachloride                | 3496.2                            | 0                              | 2586.8                            | 0                              |
| <i>m</i> -dichlorobenzene           | 3480.7                            | -15.5                          | 2576.7                            | -10.1                          |
| <i>o</i> -dichlorobenzene           | 3477.3                            | -18.9                          | 2574.7                            | -12.1                          |
| chlorobenzene                       | 3474.3                            | -21.9                          | 2573.1                            | -13.7                          |
| benzene                             | 3464                              | -32.2                          | 2569.5                            | -17.3                          |
| toluene                             | 3455                              | -41.2                          | 2565.1                            | -21.7                          |
| <i>p</i> -xylene                    | 3447.4                            | -48.8                          | 2560.6                            | -26.2                          |
| mesitylene                          | 3439.8                            | -56.4                          | 2556.4                            | -30.4                          |
| 1,2,4-trimethylbenzene              | 3442.7                            | -53.5                          | 2556.7                            | -30.1                          |
| tetramethylbenzene/CCl <sub>4</sub> | 3433                              | -63.2                          | 2552.1                            | -34.7                          |
| pentamethylbenzene/CCl <sub>4</sub> | 3427.1                            | -69.1                          | 2547.3                            | -39.5                          |
| hexamethylbenzene/CCl <sub>4</sub>  | 3415.7                            | -80.5                          | 2543.7                            | -43.1                          |

## Figures

**Figure S1.** Correlation between measured X-H stretch frequencies in different hydrogen bond complexes (in the pure aromatic solvents) and calculated electric fields arising from the aromatic hydrogen bond acceptor based on DFT. (A) Indole N-H $\cdots\pi$  interaction. (B) Thiophenol S-H $\cdots\pi$  interaction.

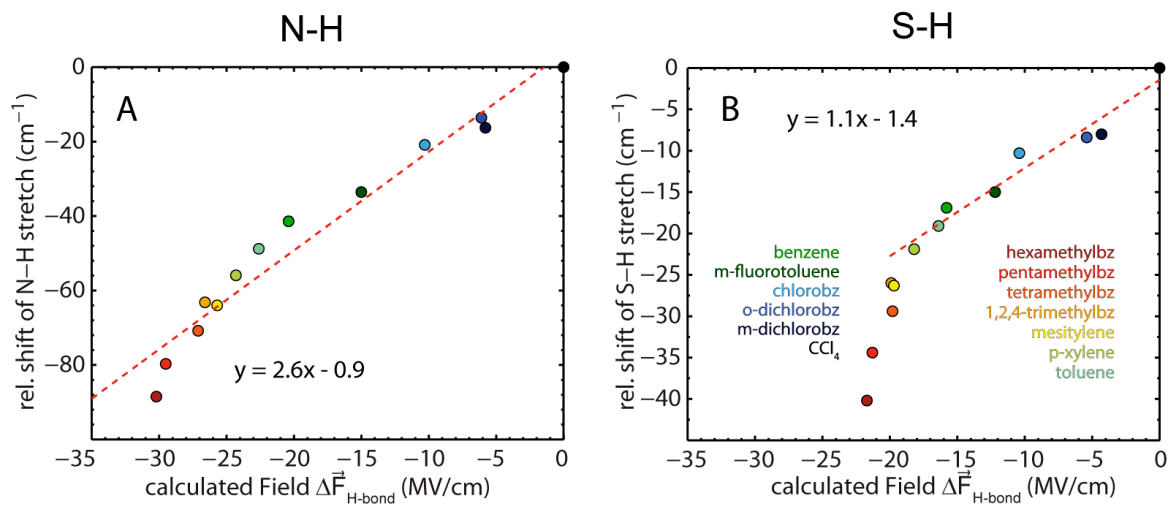

**Figure S2.** Correlation between measured N-H and N-D stretch frequencies of pyrrole in different hydrogen bond complexes (diluted in CCl<sub>4</sub>) and calculated electric fields arising from the aromatic hydrogen bond acceptor based on DFT. The sensitivity of N-D to field is much smaller than N-H, as seen earlier with phenol (O-H vs. O-D).

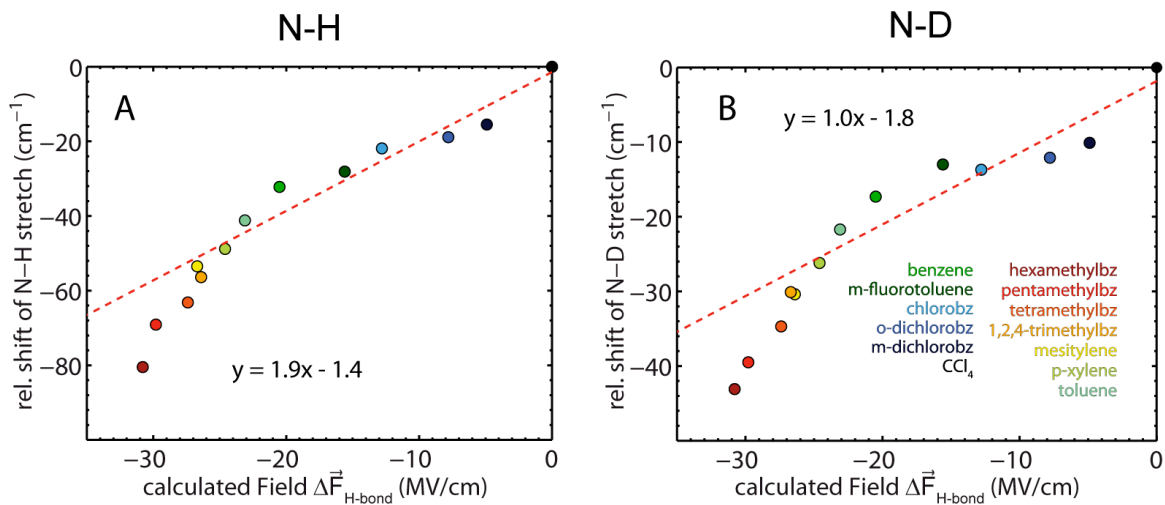

**Figure S3.** Plot of the vibrational frequencies vs. Onsager solvent reaction fields experienced by indole and thiophenol in the organic solvents. The solvent field ( $F$ ) was calculated using Onsager's equation below with the dielectric constants of the organic solvents ( $\epsilon$ ) and refractive indices of the solutes ( $n$ ).<sup>1</sup> The radius ( $a$ ) used for the spherical solute volumes was calculated from the molar volumes (3.6 Å radius for indole and thiophenol). The dipole moment ( $\mu_0$ ) was 2.11 D for indole and 1.23 D for thiophenol.<sup>2</sup>

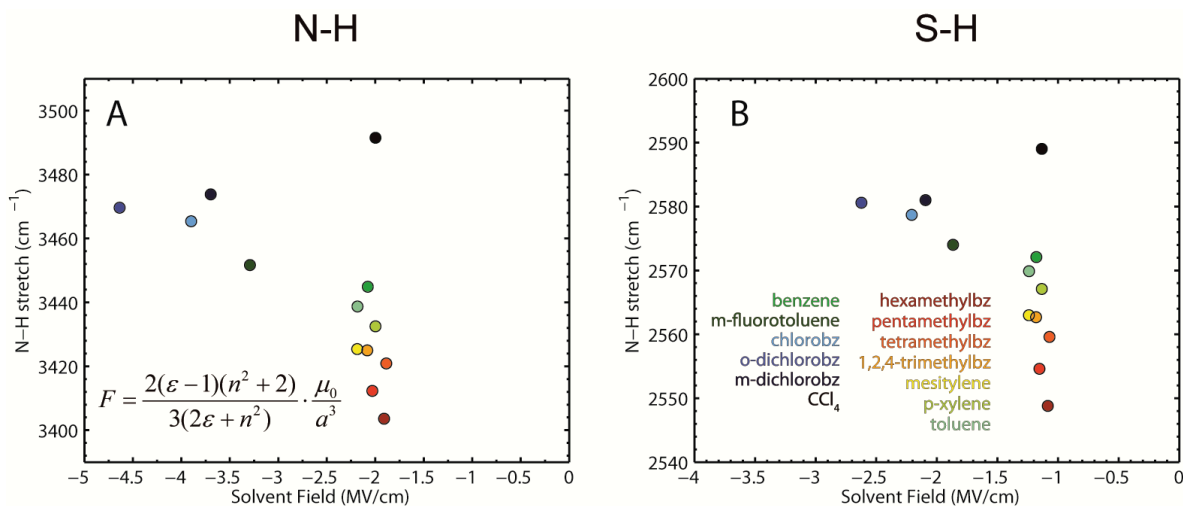

**Figure S4.** FTIR spectra of 200 mM indole and 200 mM thiophenol in different organic solvents shown without normalization. Intensities of S-H bands increase dramatically in stronger complexes.

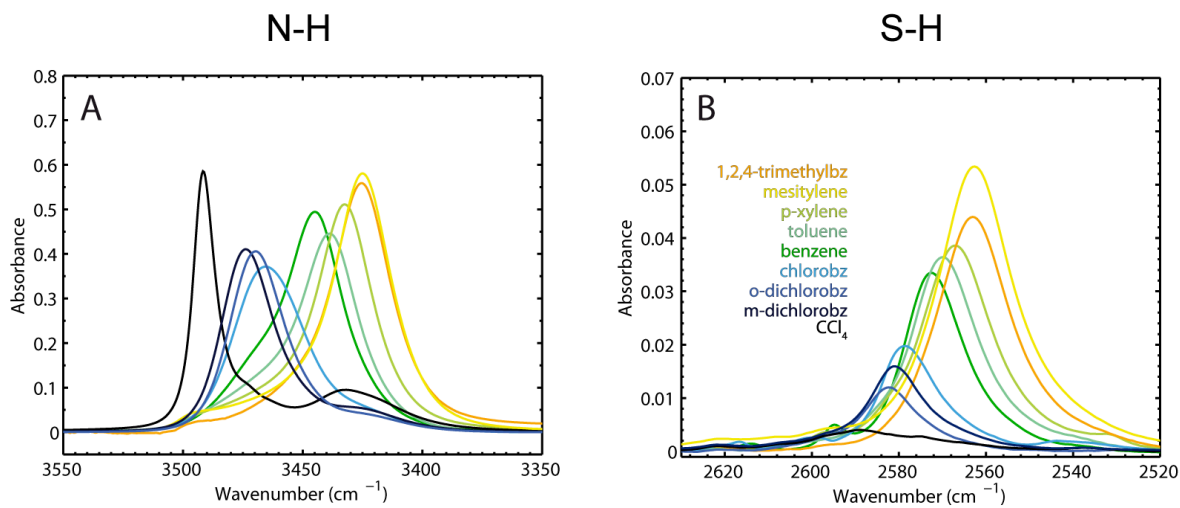

**Figure S5.** Concentration dependence of the two N-H peaks of indole dissolved in  $\text{CCl}_4$  in the room temperature FTIR spectra.

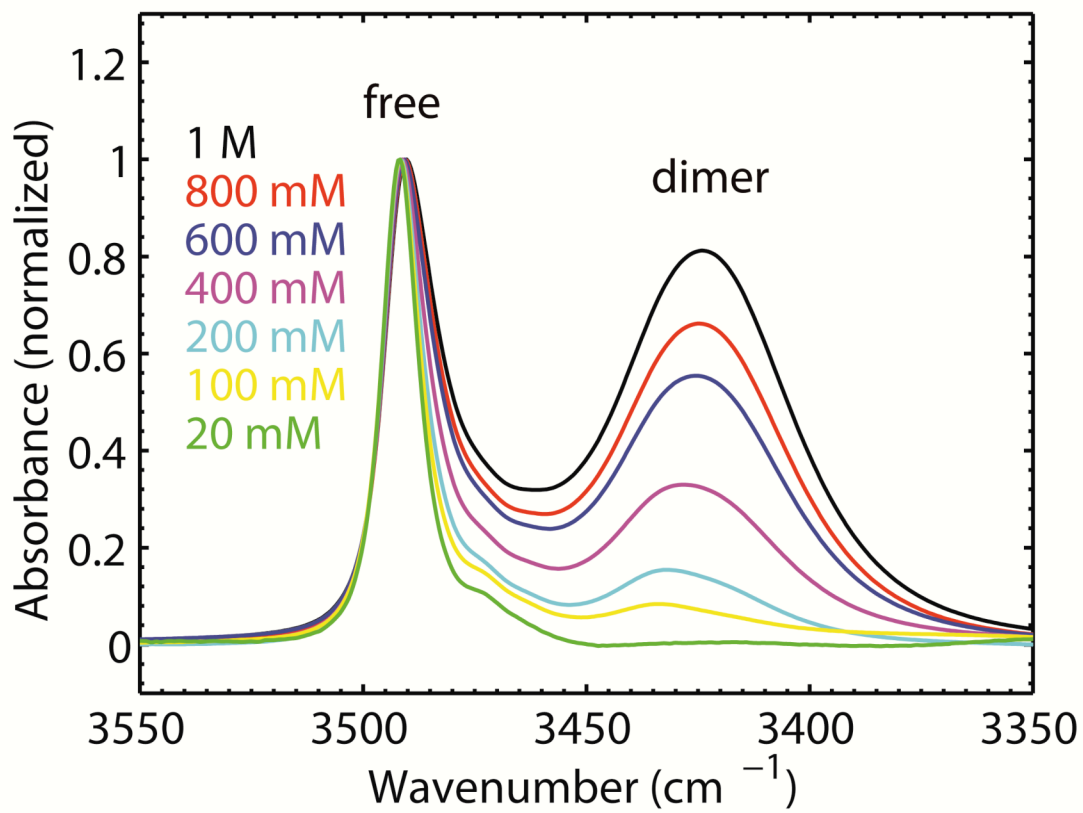



**Figure S6.** Vibrational Stark spectrum of indole in DCM/DCE recorded at  $T = 77$  K (same data as in Fig. 4B). The Stark spectrum was fitted with the experimentally obtained absorbance spectrum (this includes the assumption of a constant vibrational Stark effect for all chemical species). The Stark tuning rate of the indole:indole dimer is larger than that of the free indole species.

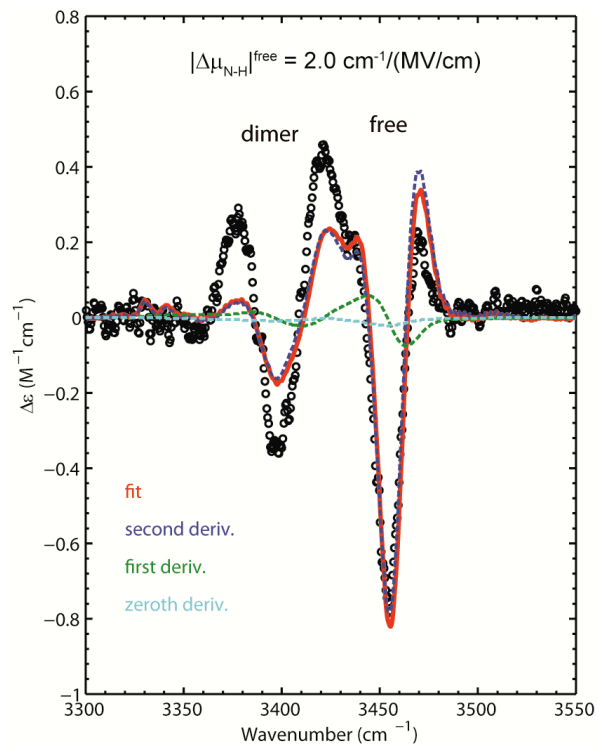

**Figure S7.** IR extinction and vibrational Stark spectra of indole in different glass-forming solvents recorded at  $T = 77$  K. (A) Extinction spectrum showing the N-H stretch in *m*-fluorotoluene ( $\tilde{\nu}_{m\text{-fluoro}} = 3436$   $\text{cm}^{-1}$ ,  $\epsilon_{\text{max}} = 82$   $\text{M}^{-1}\text{cm}^{-1}$ ). (B) Stark spectrum scaled to an applied field of 1 MV/cm (dots) with fit (red). (C) Extinction spectrum showing the N-H stretch in butyronitrile ( $\tilde{\nu} = 3332$   $\text{cm}^{-1}$ ,  $\epsilon_{\text{max}} = 235$   $\text{M}^{-1}\text{cm}^{-1}$ ). (D) Stark spectrum scaled to an applied field of 1 MV/cm (dots) with fit (red).

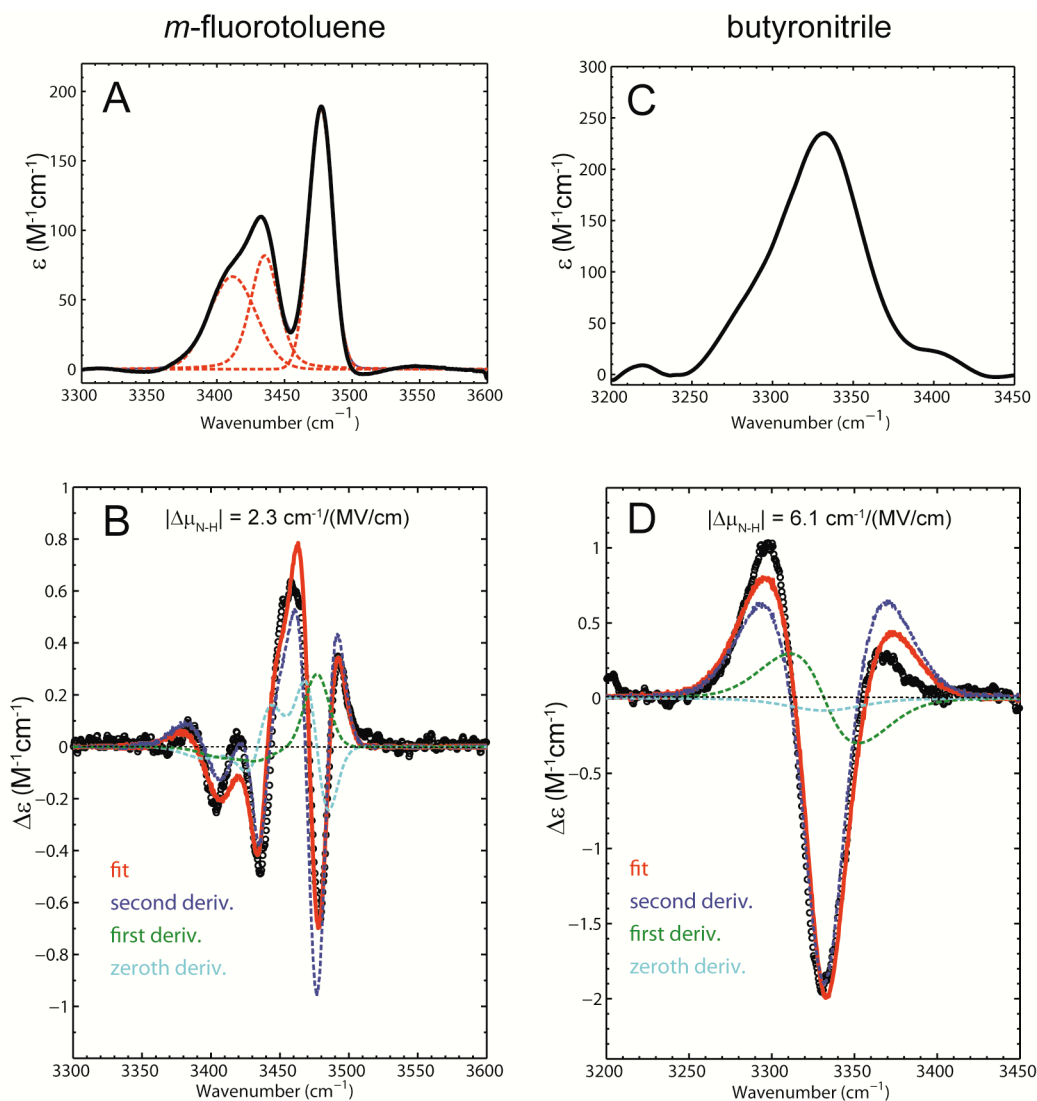

**Figure S8.** IR extinction and vibrational Stark spectra of thiophenol in different glass-forming solvents recorded at  $T = 77$  K. (A) Extinction spectrum showing the S-H stretch in *m*-fluorotoluene ( $\tilde{\nu}_{m-fluoro} = 2568$   $\text{cm}^{-1}$ ,  $\epsilon_{\text{max}} = 43$   $\text{M}^{-1}\text{cm}^{-1}$ ). (B) Stark spectrum scaled to an applied field of 1 MV/cm (dots) with fit (red). (C) Extinction spectrum showing the S-H stretch in butyronitrile ( $\tilde{\nu} = 2546$   $\text{cm}^{-1}$ ,  $\epsilon_{\text{max}} = 128$   $\text{M}^{-1}\text{cm}^{-1}$ ). (D) Stark spectrum scaled to an applied field of 1 MV/cm (dots) with fit (red).

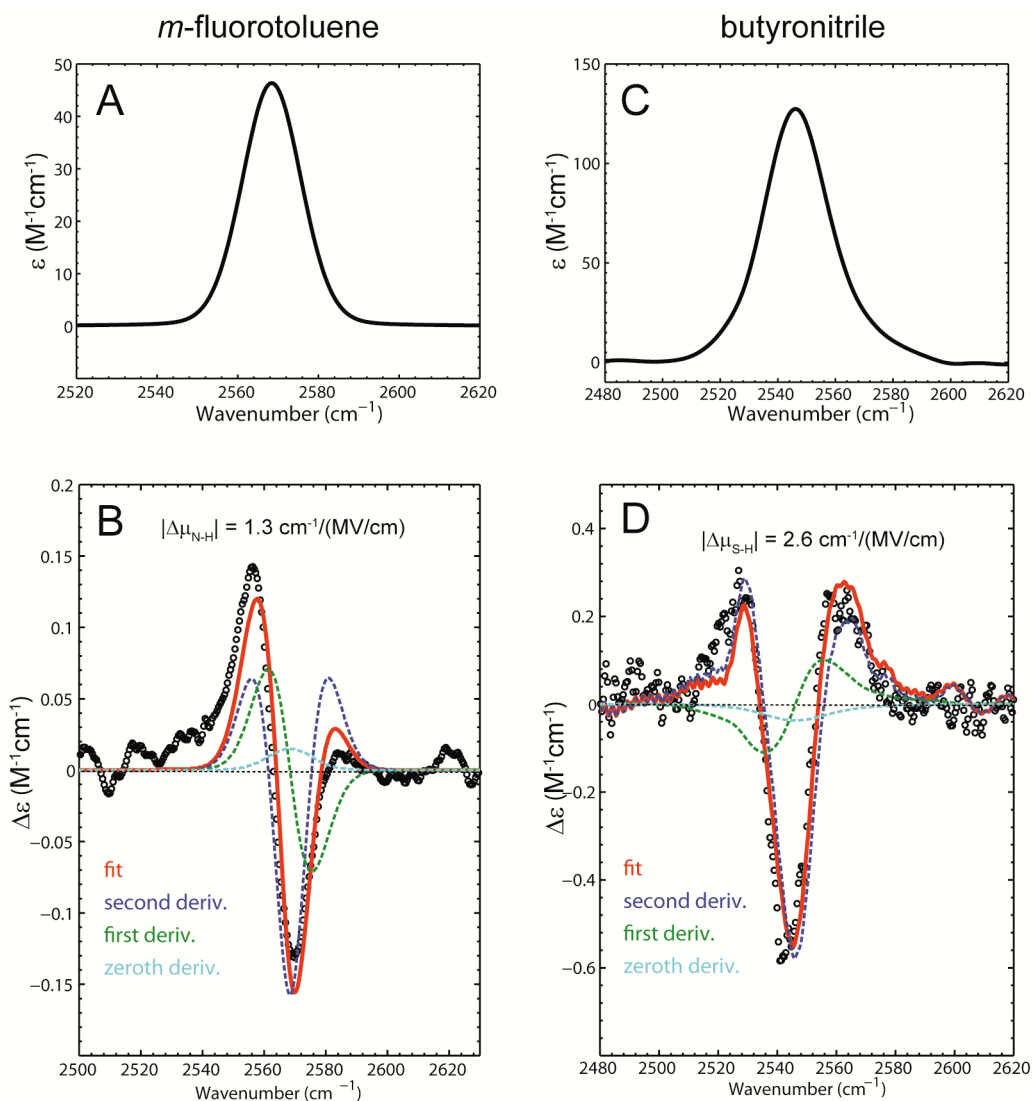

**Figure S9.** IR pump-probe experiments of thiophenol in different solvents used to determine the anharmonicity of the S-H stretch.

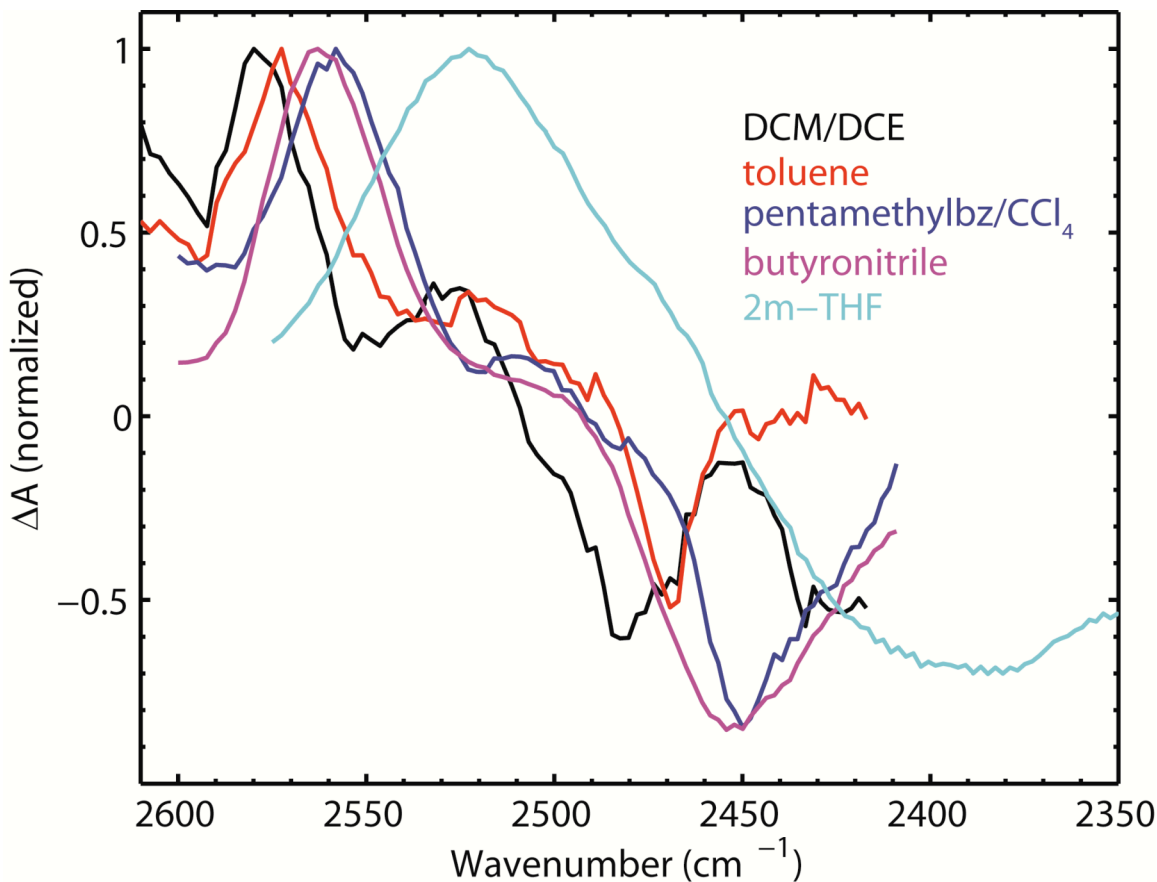

IR pulses were generated using a Ti:Sapphire regeneratively amplified laser/OPA system in which the output of the OPA are 70 fs transform limited 2  $\mu\text{J}$  IR pulses centered around 2500  $\text{cm}^{-1}$  at a 1 kHz repetition rate. The pulses provide a 230  $\text{cm}^{-1}$  bandwidth. The light is detected using a 32 element MCT array with a spectral resolution of 2  $\text{cm}^{-1}$ . Further details are presented elsewhere.<sup>3</sup> The path length of the sample cell was 160  $\mu\text{m}$  and the final OD of the samples was between 0.1 and 0.5.

| solvent                                             | anharmonicity $\tilde{\nu}_{0 \rightarrow 1} - \tilde{\nu}_{1 \rightarrow 2}$ ( $\text{cm}^{-1}$ ) |
|-----------------------------------------------------|----------------------------------------------------------------------------------------------------|
| <b>DCM/DCE</b>                                      | $100 \pm 2$                                                                                        |
| <b>toluene</b>                                      | $103 \pm 2$                                                                                        |
| <b>pentamethylbenzene/<math>\text{CCl}_4</math></b> | $108 \pm 2$                                                                                        |
| <b>butyronitrile</b>                                | $109 \pm 2$                                                                                        |
| <b>2-methyl-THF</b>                                 | $130 \pm 10$                                                                                       |

## Calculation of the anharmonic component of the difference dipole

The expectation value of the bond length for a Morse oscillator is given by<sup>4</sup>

$$M_{vv}^{(1)} = \langle v | \hat{r} | v \rangle = \frac{1}{aS} \left[ 3u + \left( \frac{7}{2} \frac{u^2}{S} + \frac{5}{24} \right) + \left( \frac{5u^3}{S^2} + \frac{3u}{4} \right) + \left( \frac{31}{4} \frac{u^4}{S^3} + \frac{17}{8} \frac{u^2}{S^3} - \frac{23}{960} \right) \right] \quad (4)$$

with

$$a = \sqrt{\frac{k}{2D_e}} \quad S = \sqrt{\frac{8m_{X-H}D_e}{\hbar^2}} \quad u = v + \frac{1}{2} \quad (5)$$

where  $a$  is the form parameter of the Morse potential which contains the force constant  $k$  of the bond and the dissociation energy  $D_e$ ,  $u = v + 1/2$  where  $v$  is the vibrational quantum number and  $S$ , a dimensionless parameter, in which  $m_{X-H}$  is the reduced mass.

The form parameter  $a$  and the dimensionless constant  $S$  can be calculated from experimentally obtained anharmonicities, which are reported in the literature (102  $\text{cm}^{-1}$  for S-H of thiophenol, 136  $\text{cm}^{-1}$  for N-H of indole and 160  $\text{cm}^{-1}$  for O-H of phenol).<sup>5-7</sup> The bond lengthening upon transition from the vibrational ground state to the first excited state is the difference  $(M_{11}^{(1)} - M_{00}^{(1)})$ .

$$\Delta x = (M_{11}^{(1)} - M_{00}^{(1)}) = \frac{1}{aS} \left[ 3 + \left( \frac{7}{S} \right) + \left( \frac{17}{S^2} \right) + \left( \frac{43}{S^3} \right) \right] \quad (6)$$

This model predicts a bond lengthening of 0.0331 Å for O-H, 0.0362 Å for S-H and 0.032 Å for N-H for the free species in DCM/DCE.

The difference dipole is then given by the difference in bond length between the vibrational ground state and the first excited state multiplied with the effective charge  $q$  of the oscillator obtained from equation 2 according to

$$|\Delta \vec{\mu}_{X-H}^{anh}| = q \cdot \Delta x = q \cdot (M_{11}^{(1)} - M_{00}^{(1)}) \quad (7)$$

From this analysis we obtain the following values:

| <b>bond</b>             | <b>solvent</b> | $\Delta x$ (Å) | $q$ (e) | $\Delta\mu^{anh}$ (D) | $\Delta\mu^{exp}$ (D) | $\Delta\mu^{anh}/\Delta\mu^{exp}$ |
|-------------------------|----------------|----------------|---------|-----------------------|-----------------------|-----------------------------------|
| <b>S-H</b>              | DCM/DCE        | 0.0362         | 0.26    | 0.0453                | 0.0654                | 0.69                              |
|                         | toluene        | 0.0370         | 0.29    | 0.0516                | 0.0893                | 0.58                              |
|                         | butyronitrile  | 0.0384         | 0.42    | 0.0780                | 0.1548                | 0.50                              |
|                         | 2-methyl-THF   | 0.0434         | 0.72    | 0.1510                | 0.2500                | 0.60                              |
| <b>N-H</b> <sup>a</sup> | DCM/DCE        | 0.0331         | 0.70    | 0.1070                | 0.1190                | 0.90                              |
| <b>O-H</b> <sup>b</sup> | DCM/DCE        | 0.0235         | 0.80    | 0.1270                | 0.1369                | 0.93                              |

<sup>a</sup> the anharmonicity is taken from the free indole species in CCl<sub>4</sub>

<sup>b</sup> the anharmonicity is taken from the free phenol species in the gas-phase

## Supporting References

1. Onsager, L. *J. Am. Chem. Soc.* **1936**, *58*, 1486-1493.
2. Lide, D. R. *CRC handbook of chemistry and physics*; CRC Press: Boca Raton, FL, 2005.
3. Steinel, T.; Asbury, J. B.; Zheng, J.; Fayer, M. D. *J. Phys. Chem. A* **2004**, *108*, 10957-10964.
4. Tipping, R. H.; Ogilvie, J. F. *J. Chem. Phys.* **1983**, *79*, 2537-2540.
5. Russell, R. A.; Thompson, H. W. *Proc. R. Soc. London, Ser. A* **1956**, *234*, 318-326.
6. Alencastro, R. B.; Sandorfy, C. *Can. J. Chem.* **1972**, *50*, 3594-3600.
7. Ishiuchi, S. i.; Fujii, M.; Robinson, T. W.; Miller, B. J.; Kjaergaard, H. G. *J. Phys. Chem. A* **2006**, *110*, 7345-7354.

## Complete Citation of Reference 28

28. Frisch, M. J.; Trucks, G. W.; Schlegel, H. B.; Scuseria, G. E.; Robb, M. A.; Cheeseman, J. R.; Scalmani, G.; Barone, V.; Mennucci, B.; Petersson, G. A.; Nakatsuji, H.; Caricato, M.; Li, X.; Hratchian, H. P.; Izmaylov, A. F.; Bloino, J.; Zheng, G.; Sonnenberg, J. L.; Hada, M.; Ehara, M.; Toyota, K.; Fukuda, R.; Hasegawa, J.; Ishida, M.; Nakajima, T.; Honda, Y.; Kitao, O.; Nakai, H.; Vreven, T.; Montgomery, J. A.; Peralta, J. E.; Ogliaro, F.; Bearpark, M.; Heyd, J. J.; Brothers, E.; Kudin, K. N.; Staroverov, V. N.; Kobayashi, R.; Normand, J.; Raghavachari, K.; Rendell, A.; Burant, J. C.; Iyengar, S. S.; Tomasi, J.; Cossi, M.; Rega, N.; Millam, J. M.; Klene, M.; Knox, J. E.; Cross, J. B.; Bakken, V.; Adamo, C.; Jaramillo, J.; Gomperts, R.; Stratmann, R. E.; Yazyev, O.; Austin, A. J.; Cammi, R.; Pomelli, C.; Ochterski, J. W.; Martin, R. L.; Morokuma, K.; Zakrzewski, V. G.; Voth, G. A.; Salvador, P.; Dannenberg, J. J.; Dapprich, S.; Daniels, A. D.; Farkas; Foresman, J. B.; Ortiz, J. V.; Cioslowski, J.; Fox, D. J. *Gaussian 09*, Revision A.02. Gaussian, Inc.: Wallingford, CT, 2009.
